# Supplementary material for: Mineralogical and Geochemical Properties of Greek Evaporites, Associated with Their Prospects of Industrial Use
Source: MDPI journal article supplement (doi:10.3390/materproc2021005003), 2021-10-22
Supplement: s1 [file materproc-1449560-supplementary.xlsx]

## Sheet: Sheet1
Supplementary Table S1. Representative chemical composition of selected minerals
Sample	ST-3	ST-3	ET-4	ST-3	KAS-3	ST-3	AL-2	ET-4	ST-3	ST-3	ST-3	ST-3
Anal.	04C	08A	2021-03-01	3	5	04A	2	2b	1	08B	03B	06B
Name	Gp	Gp	Gp	Anh	Cel	Cel	Cel	Dol	Dol	Dol	Dol	Dol
Rock	Anh.	Anh.	Gyp.	Anh.	Gyp.	Anh.	Gyp.	Gyp.	Anh.	Anh.	Anh.	Anh.
SiO2	0.38	0	0	0	0	0	0	0	0	0	0	0.34
CaO	32.1	31.83	33.55	38.14	1.69	0	0.81	28.64	28.34	27.89	27.56	27.78
MgO	0	0	0	0	0	0	0	22.18	21.22	19.82	20.09	20.04
K2O	0.22	0	0	0	0	0	0	0	0	0	0	0
SO3	48.63	47.82	45.5	59.15	44.76	44.73	46.77	0.28	0	0	0	0
SrO	0	0	0	0.86	51.83	55.58	52.42	0	0	0	0	0
Total	81.33	79.65	79.05	98.15	98.28	100.31	100	51.1	49.56	47.71	47.65	48.16
Abbreviations: Anal.:Analysis, Gp: gypsum, Anh: Anhydrite, Cel: Celestite, Dol: Dolomite, Anh.: Anhydrite-rich evaporite, Gyp: Gypsum-rich evaporite
